# Supplementary material for: PEGylated poly(lactic-co-glycolic acid) nanoparticles doped with molybdenum-iodide nanoclusters as a promising photodynamic therapy agent against ovarian cancer
Source: Royal Society of Chemistry journal article supplement (doi:10.1039/d3ma00206c), 2023-01-01

## Electronic Supplementary Information

### PEGylated poly(lactic-co-glycolic acid) nanoparticles doped with molybdenum-iodide nanoclusters as a promising photodynamic therapy agent against ovarian cancer

Alexis Verger,<sup>a\*</sup> Gilles Dollo,<sup>a,b</sup> Nolwenn Brandhonneur,<sup>a</sup> Sophie Martinais,<sup>a</sup> Stéphane Cordier,<sup>a</sup> Kamil Lang,<sup>c</sup> Maria Amela-Cortes<sup>a</sup> and Kaplan Kirakci<sup>c\*</sup>

<sup>a</sup>*Univ Rennes, ISCR (Institut des Sciences Chimiques de Rennes) – UMR 6226, F-35000, Rennes, France*

<sup>b</sup>*CHU de Rennes, Pôle Hospitalo-Universitaire de Pharmacie, F-35033, Rennes, France*

<sup>c</sup>*Institute of Inorganic Chemistry of the Czech Academy of Sciences, Řež 1001, 250 68 Husinec-Řež, Czech Republic.*

#### Content

**Figure S1.** Size distributions by number of fresh and 1-week old PBS dispersion of **1@PLGA-PEG** at room temperature, as obtained by dynamic light scattering.

**Figure S2.** Absorption spectra of **1@PLGA-PEG** dispersion in PBS.

**Figure S3.** Emission spectra and phosphorescence decay kinetics of **1** in air- and argon-saturated PBS.

**Figure S4.** Emission spectra and phosphorescence decay kinetics of fresh and 1-week old **1@PLGA-PEG** in air-saturated PBS.

**Figure S5.** Emission spectra and phosphorescence decay kinetics of fresh and 1-week old **1** in air-saturated PBS.

**Figure S6.** DNA damage study results by the H2AX method (ImPACcell platform, Rennes).

**Figure S1.** Size distributions by number of fresh (red) and 1-week old (green) PBS dispersion of **1@PLGA-PEG** at room temperature, as obtained by dynamic light scattering.

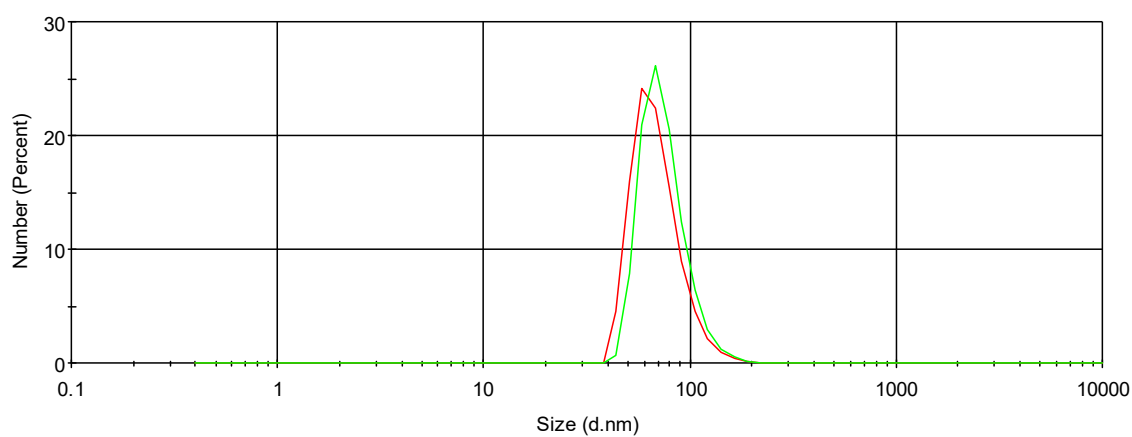

**Figure S2.** Absorption spectra of **1@PLGA-PEG** dispersion in PBS.

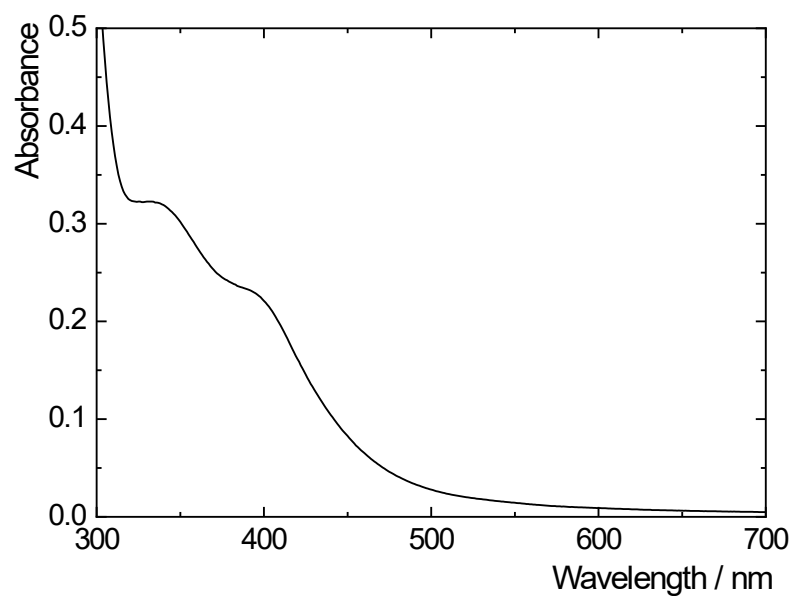

**Figure S3.** Phosphorescence emission spectra of **1** in argon- (red) and air- (black) saturated PBS, excited at 400 nm (A). Phosphorescence decay kinetics at 700 nm of **1** in argon- (red) and air- (black) saturated PBS, excited at 405 nm (B).

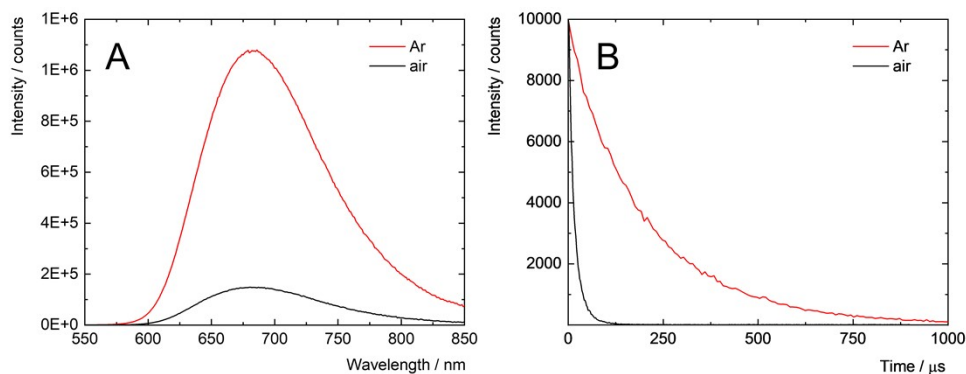

**Figure S4.** Emission spectra of fresh (black) and 1-week old (red) **1@PLGA-PEG** (A) in air-saturated PBS, excited at 400 nm. Phosphorescence decay kinetics at 700 nm of fresh (black) and 1-week old (red) **1@PLGA-PEG** (B) in air-saturated PBS, excited at 405 nm.

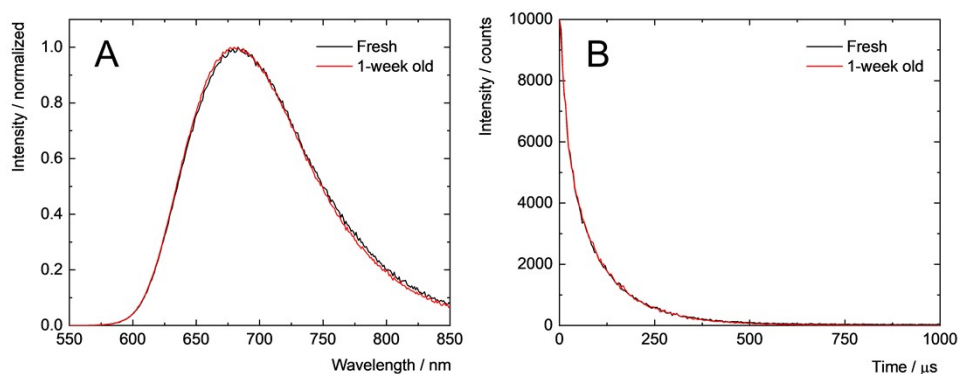

**Figure S5.** Emission spectra of fresh (black) and 1-week old (red) **1** (A) in air-saturated PBS, excited at 400 nm. Phosphorescence decay kinetics at 700 nm of fresh (black) and 1-week old (red) **1** (B) in air-saturated PBS, excited at 405 nm.

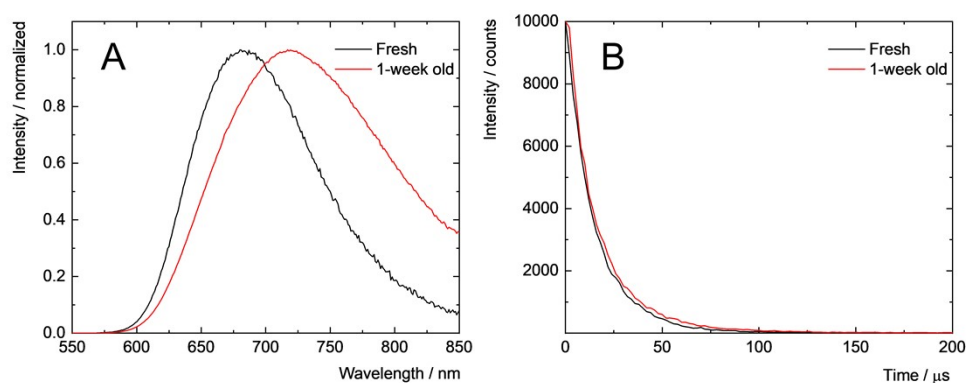

**Figure S6:** DNA damage on SKOV-3 cells incubated 5 hours with **1@PLGA-PEG** or **2@PLGA-PEG**, then left in the dark (black) or irradiated at 365 nm (blue). The results were obtained by the H2AX method (ImPACcell platform, Rennes). The negative control is obtained by the value of the DMEM media, the positive controls are evaluated for 2 concentrations of H<sub>2</sub>O<sub>2</sub>. Results are the mean  $\pm$  s.d of 3 true replicates. P value <0.005, Mann-Whitney test (R software).

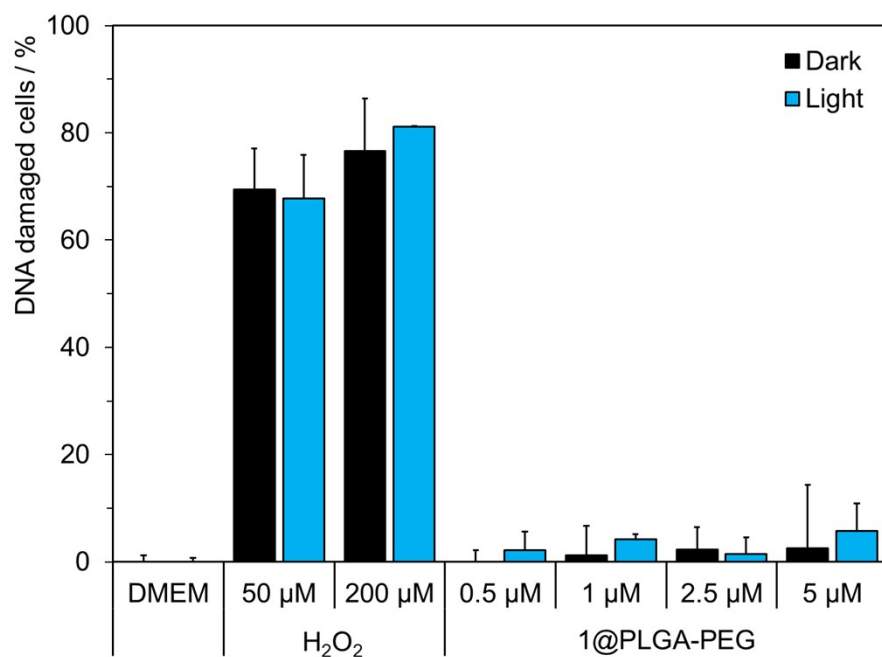

Supplement: d3ma00206c1.pdf [file d3ma00206c1.pdf]
